# Supplementary material for: Lactobacillus-derived artificial extracellular vesicles for skin rejuvenation and prevention of photo-aging
Source: Royal Society of Chemistry journal article supplement (doi:10.1039/d4bm01644k), 2025-01-01
Supplement: d4bm01644k1.pdf [file d4bm01644k1.pdf]

ARTICLE

***Lactobacillus*-derived artificial extracellular vesicles for skin  
rejuvenation and prevention of photo-aging**

Received 00th January 20xx,  
Accepted 00th January 20xx

DOI: 10.1039/x0xx00000x

Seongsu Kang <sup>a</sup>, Saetbyeol Jeon <sup>b</sup>, Hwira Baek <sup>b</sup>, Sunghwan Hwang <sup>a</sup>, Seulgi Kim <sup>b</sup>, Sung Hun Youn <sup>a</sup>,  
Jin Woong Kim <sup>\*b</sup>, Seung-Hyun Jun <sup>\*a</sup>, Nae-Gyu Kang <sup>\*a</sup>

**Supplementary information**

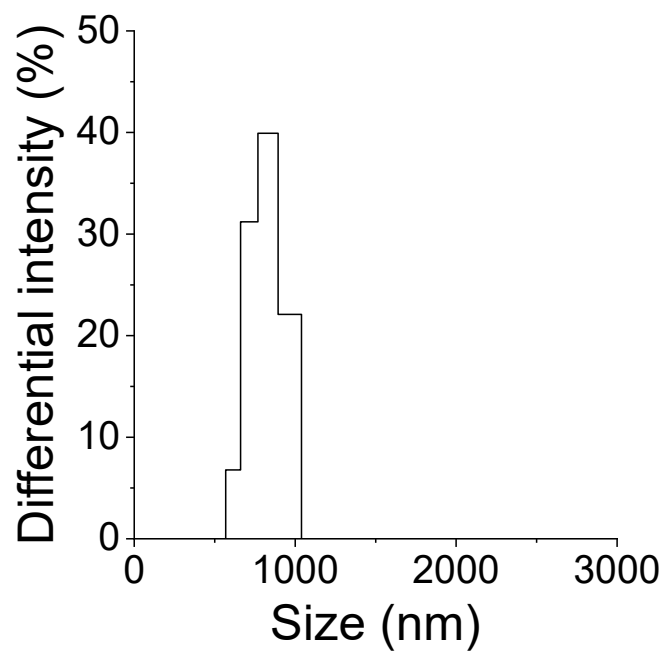

Fig S1. Particle size distribution (DLS) for CLSM analysis

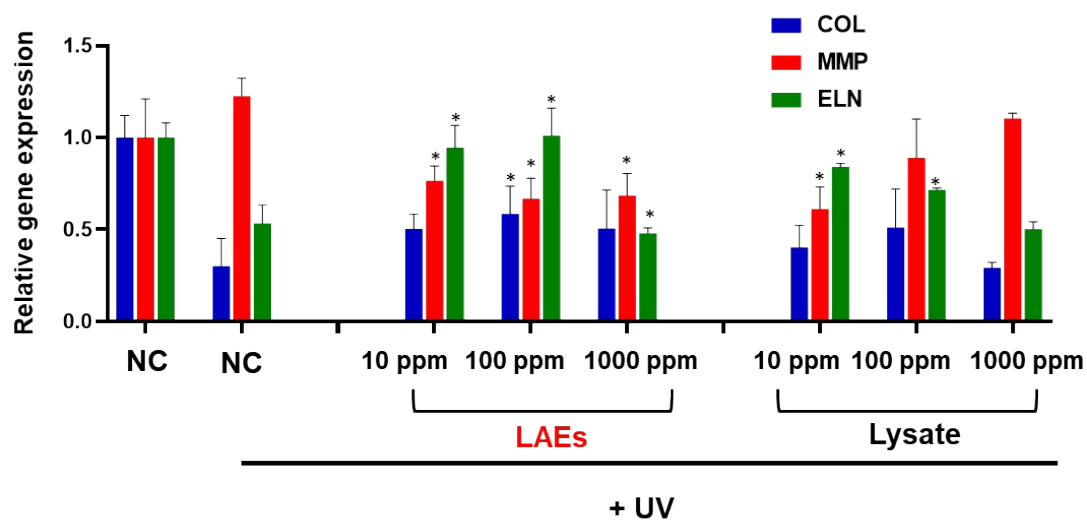

Fig S2. Gene expression of COL1A1 (COL), MMP, and ELN of fibroblasts under UV irradiation. RT-qPCR was performed. All measurements were performed in triplicate. Student's t-test was performed for comparison between control group (0 ppm) and experimental groups (\* Significantly different results ( $p < 0.05$ )).

|          | No UV | UV       | UV+100ppm | UV+1000ppm |
|----------|-------|----------|-----------|------------|
| LMNA     | 0     | 0.393696 | 1.908567  | 0.179003   |
| C5AR1    | 0     | -2.24027 | -0.33952  | -1.59707   |
| CASP1    | 0     | -0.44965 | 1.853615  | 0.628426   |
| TFB2M    | 0     | -2.17373 | 0.077595  | -1.08405   |
| C1QA     | 0     | -1.93757 | 0.934542  | -1.42207   |
| SMAD2    | 0     | -0.23726 | 1.238085  | -0.29718   |
| EML1     | 0     | 0.708452 | 2.336575  | 2.175983   |
| TMEM33   | 0     | -2.22203 | 0.603945  | -1.24911   |
| POT1     | 0     | -1.56445 | -0.22534  | -1.86902   |
| BUB1B    | 0     | 0.245068 | 0         | -0.06495   |
| PDCD6    | 0     | -0.61371 | 1.80419   | 0.779917   |
| TERF2    | 0     | -4.60871 | 1.839054  | -1.52106   |
| CALB1    | 0     | -13.7575 | -7.5      | -5.99578   |
| FCGR1A   | 0     | -2.93017 | -0.85729  | -2.12224   |
| FCGR3B   | 0     | -9.0596  | -2.3      | -1.5       |
| TFAM     | 0     | -2.15424 | -0.96249  | -2.65236   |
| CXCL16   | 0     | -2.62188 | 0.070005  | -1.97138   |
| LMNB1    | 0     | -0.48942 | 0.797792  | 0.20299    |
| CDKN1C   | 0     | -2.10603 | 0.646767  | -1.31615   |
| FCGBP    | 0     | -3.41858 | -1.07859  | -2.19099   |
| S100A9   | 0     | -8.027   | -4.84119  | 1.037235   |
| SCN2B    | 0     | -4.875   | -0.20408  | -1.96187   |
| RNF144B  | 0     | -6.77066 | -0.13368  | -0.93057   |
| ZMPSTE24 | 0     | -1.13549 | -0.01107  | -0.96479   |
| ANXA5    | 0     | -2.73955 | 1.160156  | -0.62058   |
| CD14     | 0     | -2.24914 | -0.77305  | -1.61155   |
| GFAP     | 0     | -5.28468 | -1.18341  | 2.432816   |
| LMNB2    | 0     | -1.29758 | 1.35607   | -0.94436   |
| TPP1     | 0     | 0.02029  | 1.658588  | -0.04313   |
| TERF1    | 0     | -1.80374 | 0.345474  | -1.38372   |
| S100A8   | 0     | -5.66393 | -1.79742  | -2.7568    |
| C1QC     | 0     | -3.67566 | -0.05229  | -2.19043   |
| C3AR1    | 0     | -1.32591 | -0.44468  | -1.90716   |
| C3       | 0     | 1.286354 | 1.061121  | 1.032917   |
| ANXA3    | 0     | -2.18901 | 1.889889  | -0.62079   |
| SIRT6    | 0     | -3.35358 | -0.32077  | -1.25388   |
| ZNF25    | 0     | -5.14189 | 2.192438  | 2.265619   |
| ARID1A   | 0     | -4.66077 | 1.349262  | -2.16828   |
| FOXO1    | 0     | -1.04588 | 0.640257  | 0.70331    |
| NDUFB11  | 0     | -2.3941  | 1.151772  | -0.77268   |
| ELP3     | 0     | -1.54299 | 2.6329    | 0.645229   |
| ARL6IP6  | 0     | -0.18482 | 1.301407  | -0.33871   |
| CLU      | 0     | -2.90402 | 0.454887  | -1.32731   |
| COL3A1   | 0     | -0.31445 | 2.338247  | 0.778629   |
| TXNIP    | 0     | -0.24236 | 5.021284  | 1.693569   |
| COL1A1   | 0     | 0.416454 | 2.215582  | 1.016754   |
| ANGEL2   | 0     | -0.00722 | 1.72805   | 0.641045   |
| ZFR      | 0     | -2.69256 | 0.862247  | -1.06368   |
| C1S      | 0     | -1.13413 | 1.621946  | 0.093973   |
| PHF3     | 0     | -1.33777 | 0.448582  | -1.13161   |
| TLR4     | 0     | -2.18286 | 0.414967  | -1.44843   |
| RAP1A    | 0     | -2.31905 | 0.786427  | -1.16147   |
| MRPL43   | 0     | -2.2184  | -0.0522   | -1.43079   |
| CCR1     | 0     | -2.38281 | -0.61624  | -2.01722   |
| CD163    | 0     | -4.0012  | -0.10423  | -2.55899   |
| POLRMT   | 0     | -3.21143 | 0.33884   | -1.43044   |
| TOLLIP   | 0     | -2.2796  | 1.009134  | -0.77496   |
| ZBTB10   | 0     | -3.06334 | 0.025511  | -1.49576   |
| CX3CL1   | 0     | -5.12134 | -0.03137  | -3.0864    |
| TLR2     | 0     | -2.72143 | 0.007557  | -1.55689   |
| ELAVL1   | 0     | -0.45701 | 0.978327  | -0.84974   |
| TMEM135  | 0     | 1.530552 | 3.990757  | 3.06439    |
| VWA5A    | 0     | -1.71552 | -0.77044  | -1.77803   |
| PANX1    | 0     | -1.67533 | -0.01301  | -1.73992   |
| TFB1M    | 0     | -0.78034 | 0.88903   | 0.113352   |
| SIRT3    | 0     | 0.461281 | 4.95635   | 4.579897   |
| WRN      | 0     | -0.03937 | 3.389839  | 1.856697   |
| SNAP23   | 0     | -0.87273 | 3.48185   | 1.996395   |
| EP300    | 0     | -1.07166 | 0.274616  | -0.23037   |
| LTF      | 0     | -7.42984 | -3.85805  | -7.94579   |
| LSM5     | 0     | -2.56866 | 2.432156  | 0.644379   |
| HSF1     | 0     | -1.03703 | 1.171293  | -0.08578   |
| VPS13C   | 0     | -0.50426 | 4.211584  | 2.448631   |
| SIRT1    | 0     | -2.79076 | -0.15395  | -1.63955   |
| MBP      | 0     | -2.04049 | 0.197905  | -0.94444   |

Table S 1. Aging-related gene expression profile. The fold changes ( $\Delta\Delta\text{CT}$ ) were demonstrated.

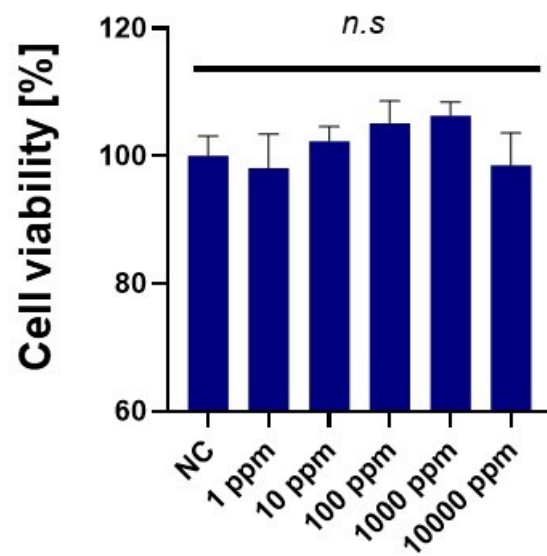

Fig S3. Cell viability examined by CCK-8 Hs68 was treated with LAEs for 24h.

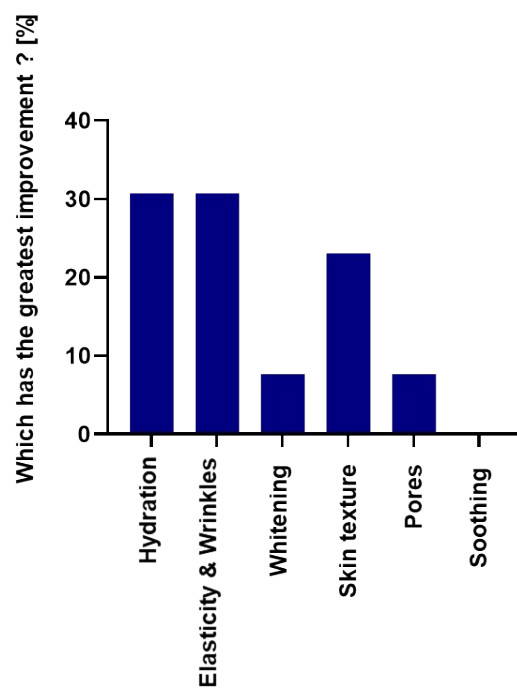

Fig S4. Self-questionnaire for the most perceived effect.

## Original raw data

Figure 2a

|                  | COL1A1     |       | MMP-1      |        | ELN        |       |
|------------------|------------|-------|------------|--------|------------|-------|
|                  | Expression | SEM   | Expression | SEM    | Expression | SEM   |
| <b>NC</b>        | 1          |       | 1          |        | 1          |       |
| <b>Control</b>   | 0.44       | 0.12  | 1.2254     | 0.05   | 0.4031     | 0.121 |
| <b>TGF-beta</b>  | 0.59       | 0.12  | 0.8        | 0.0412 | 0.4985     | 0.098 |
| <b>1 ppm</b>     | 0.49       | 0.05  | 0.9        | 0.11   | 0.41251    | 0.08  |
| <b>10 ppm</b>    | 0.68       | 0.11  | 0.765      | 0.08   | 0.4031     | 0.12  |
| <b>100 ppm</b>   | 0.77       | 0.08  | 0.667916   | 0.01   | 0.512      | 0.098 |
| <b>1000 ppm</b>  | 0.41       | 0.078 | 0.683958   | 0.098  | 0.2921     | 0.07  |
| <b>10000 ppm</b> | 0.51       | 0.105 | 0.7125     | 0.121  | 0.3125     | 0.12  |

Figure 2b

|                  | Wound area [%] | SEM   |
|------------------|----------------|-------|
| <b>NC</b>        | 100            |       |
| <b>1 ppm</b>     | 85             | 8.45  |
| <b>10 ppm</b>    | 89             | 10.12 |
| <b>100 ppm</b>   | 61             | 5.12  |
| <b>1000 ppm</b>  | 53             | 9.812 |
| <b>10000 ppm</b> | 89             | 7.12  |

Figure 2c

|                  | HA synthesis [%] | SEM  |
|------------------|------------------|------|
| <b>RA</b>        | 14.6             | 2.12 |
| <b>1 ppm</b>     | -1.5             | 0.15 |
| <b>10 ppm</b>    | -2.9             | 0.5  |
| <b>100 ppm</b>   | 0.51             | 0.98 |
| <b>1000 ppm</b>  | 1.52             | 0.19 |
| <b>10000 ppm</b> | 4.3              | 0.85 |

Figure 2d

|                | IL 6 expression [%] | SEM  |
|----------------|---------------------|------|
| <b>NC</b>      | 100                 |      |
| <b>Dex</b>     | 43.08               | 3.15 |
| <b>1 ppm</b>   | 68.31               | 4.12 |
| <b>10 ppm</b>  | 81.12               | 5.12 |
| <b>100 ppm</b> | 78.01               | 6.12 |

|                 |        |      |
|-----------------|--------|------|
| <b>1000 ppm</b> | 101.05 | 8.15 |
|-----------------|--------|------|

Figure 2e

|                 | <b>IL 1<math>\alpha</math><br/>expression [%]</b> | <b>SEM</b> |
|-----------------|---------------------------------------------------|------------|
| <b>NC</b>       | 100                                               |            |
| <b>Dex</b>      | 80.57                                             | 8.12       |
| <b>1 ppm</b>    | 70.53183                                          | 11.52      |
| <b>10 ppm</b>   | 69.50509                                          | 12.85      |
| <b>100 ppm</b>  | 72.153                                            | 15.32      |
| <b>1000 ppm</b> | 80.0092                                           | 9.85       |

Figure 2f

|             |           | <b>-LAEs</b> |            |      | <b>+LAEs</b> |       |
|-------------|-----------|--------------|------------|------|--------------|-------|
|             |           |              | Expression | SEM  | Expression   | SEM   |
|             |           | noUV         | 1.563      | 0.12 |              |       |
|             |           | NC           | 1          | 0.05 | 1.3          | 0.12  |
| <b>+ UV</b> | Adenosine | 10 ppm       | 1.740761   | 0.09 | 1.842663     | 0.21  |
|             |           | 50 ppm       | 1.555623   | 0.11 | 1.946609     | 0.15  |
|             |           | 100 ppm      | 1.561269   | 0.21 | 1.982155     | 0.098 |
|             | HSA       | 1 ppm        | 1.602539   | 0.15 | 2.005773     | 0.11  |
|             |           | 5 ppm        | 1.503391   | 0.21 | 2.154826     | 0.19  |
|             |           |              |            |      |              |       |

Figure 3a

|            |          | <b>Senescence</b> | <b>SEM</b> |
|------------|----------|-------------------|------------|
|            |          | NC (no UV)        | 1          |
| <b>+UV</b> | 0 ppm    | 1.504714          | 0.081      |
|            | 1 ppm    | 1.58512           | 0.08       |
|            | 10 ppm   | 1.676436          | 0.152      |
|            | 100 ppm  | 1.215             | 0.053      |
|            | 1000 ppm | 1.3125            | 0.0412     |



Figure 4b

|                     | SC   | Epidermis | Dermis | Reservoir | Total |       |
|---------------------|------|-----------|--------|-----------|-------|-------|
|                     |      |           |        |           |       | SEM   |
| Free-FITC           | 0.21 | 0.51      | 0.61   | 0.94      | 2.27  | 0.152 |
| Artificial EV 0.5 X | 0.26 | 0.96      | 0.83   | 0.83      | 2.88  | 0.325 |
| Artificial EV 1 X   | 0.18 | 1.07      | 0.66   | 0.83      | 2.74  | 0.198 |

Figure 5a

|         | Frontal eye wrinkle |       | Lateral eye wrinkle (Crow's feet) |      | Nasolabial folds |      |
|---------|---------------------|-------|-----------------------------------|------|------------------|------|
|         | Improvement [%]     | SEM   | Improvement [%]                   | SEM  | Improvement [%]  | SEM  |
| 2 weeks | 9.61                | 5.815 | 12.26                             | 4.85 | 4.48             | 4.52 |
| 4 weeks | 9.08                | 2.31  | 12.97                             | 5.12 | 8.7              | 3.42 |
| 8 weeks | 11.49               | 3.12  | 20.23                             | 4.52 | 11.43            | 3.42 |

Supplementary figure 1

|     |        | COL        |          | MMP        |          | ELN        |          |      |
|-----|--------|------------|----------|------------|----------|------------|----------|------|
|     |        | Expression | SEM      | Expression | SEM      | Expression | SEM      |      |
| +UV | NC     | 1          | 0.12     | 1          | 0.21     | 1          | 0.08     |      |
|     | NC     | 0.300448   | 0.15     | 1.225429   | 0.098    | 0.533713   | 0.1      |      |
|     | EV     | 10 ppm     | 0.50496  | 0.08       | 0.765571 | 0.08       | 0.946234 | 0.12 |
|     |        | 100 ppm    | 0.585071 | 0.15       | 0.667916 | 0.11       | 1.01054  | 0.15 |
|     |        | 1000 ppm   | 0.505688 | 0.21       | 0.683958 | 0.12       | 0.479323 | 0.03 |
|     | Lysate | 10 ppm     | 0.403137 | 0.12       | 0.611998 | 0.12       | 0.840001 | 0.02 |
|     |        | 100 ppm    | 0.51     | 0.21       | 0.891    | 0.21       | 0.7152   | 0.01 |
|     |        | 1000 ppm   | 0.292169 | 0.03       | 1.102848 | 0.03       | 0.502162 | 0.04 |
